# Supplementary material for: Investigation of positron scattering from atomic fluorine and fluorine-containing molecules
Source: Royal Society of Chemistry journal article supplement (doi:10.1039/d6ra01378c), 2026-04-14
Supplement: d6ra01378c1.pdf [file d6ra01378c1.pdf]

*Supplementary material for:*

# Investigation of positron scattering from atomic fluorine and fluorine-containing molecules

Ashutosh Yadav and Bobby Antony\*

*Department of Physics, Indian Institute of Technology (ISM) Dhanbad, JH 826004, India*

E-mail: [bobby@iitism.ac.in](mailto:bobby@iitism.ac.in)

Table S1: Positron Scattering Cross-section of  $F$  atom in units of  $\text{\AA}^2$ 

| E (eV) | $Q_{total}$ | $Q_{el}$ | $Q_{inel}$ | $Q_{ion}$ | $Q_{ps}$ | E (eV) | $Q_{total}$ | $Q_{el}$ | $Q_{inel}$ | $Q_{ion}$ | $Q_{ps}$ |
|--------|-------------|----------|------------|-----------|----------|--------|-------------|----------|------------|-----------|----------|
| 1      | 1.319       | 1.319    | 0          | 0         | 0        | 600    | 1.067       | 0.413    | 0.654      | 0.561     | 0        |
| 2      | 1.495       | 1.495    | 0          | 0         | 0        | 700    | 0.968       | 0.38     | 0.588      | 0.513     | 0        |
| 3      | 1.575       | 1.575    | 0          | 0         | 0        | 800    | 0.889       | 0.353    | 0.536      | 0.475     | 0        |
| 4      | 1.613       | 1.613    | 0          | 0         | 0        | 900    | 0.822       | 0.33     | 0.492      | 0.441     | 0        |
| 5      | 1.632       | 1.632    | 0          | 0         | 0        | 1000   | 0.766       | 0.31     | 0.456      | 0.413     | 0        |
| 6      | 1.639       | 1.639    | 0          | 0         | 0        | 1500   | 0.577       | 0.241    | 0.336      | 0.314     | 0        |
| 7      | 1.64        | 1.64     | 0          | 0         | 0        | 2000   | 0.467       | 0.199    | 0.268      | 0.255     | 0        |
| 8      | 1.637       | 1.637    | 0          | 0         | 0        | 2500   | 0.394       | 0.17     | 0.224      | 0.215     | 0        |
| 9      | 1.632       | 1.631    | 0.001      | 0         | 0        | 3000   | 0.342       | 0.15     | 0.192      | 0.186     | 0        |
| 10     | 1.625       | 1.624    | 0.001      | 0         | 0        | 3500   | 0.303       | 0.134    | 0.169      | 0.165     | 0        |
| 11     | 1.622       | 1.615    | 0.007      | 0         | 0.006    | 4000   | 0.273       | 0.121    | 0.152      | 0.149     | 0        |
| 12     | 1.683       | 1.6      | 0.083      | 0         | 0.082    | 4500   | 0.247       | 0.111    | 0.136      | 0.133     | 0        |
| 13     | 1.793       | 1.579    | 0.214      | 0         | 0.213    | 5000   | 0.227       | 0.102    | 0.125      | 0.123     | 0        |
| 14     | 1.925       | 1.554    | 0.371      | 0         | 0.37     |        |             |          |            |           |          |
| 15     | 2.068       | 1.529    | 0.539      | 0         | 0.538    |        |             |          |            |           |          |
| 16     | 2.209       | 1.504    | 0.705      | 0         | 0.704    |        |             |          |            |           |          |
| 17     | 2.344       | 1.481    | 0.863      | 0         | 0.862    |        |             |          |            |           |          |
| 18     | 2.473       | 1.461    | 1.012      | 0         | 1.007    |        |             |          |            |           |          |
| 19     | 2.59        | 1.442    | 1.148      | 0.004     | 1.116    |        |             |          |            |           |          |
| 20     | 2.698       | 1.426    | 1.272      | 0.015     | 1.193    |        |             |          |            |           |          |
| 25     | 3.1         | 1.373    | 1.727      | 0.174     | 1.299    |        |             |          |            |           |          |
| 30     | 3.322       | 1.343    | 1.979      | 0.404     | 1.204    |        |             |          |            |           |          |
| 35     | 3.428       | 1.319    | 2.109      | 0.614     | 1.063    |        |             |          |            |           |          |
| 40     | 3.464       | 1.296    | 2.168      | 0.779     | 0.924    |        |             |          |            |           |          |
| 45     | 3.457       | 1.272    | 2.185      | 0.902     | 0.8      |        |             |          |            |           |          |
| 50     | 3.424       | 1.246    | 2.178      | 0.989     | 0.695    |        |             |          |            |           |          |
| 60     | 3.317       | 1.193    | 2.124      | 1.092     | 0.53     |        |             |          |            |           |          |
| 70     | 3.187       | 1.139    | 2.048      | 1.136     | 0.412    |        |             |          |            |           |          |
| 80     | 3.057       | 1.088    | 1.969      | 1.15      | 0.326    |        |             |          |            |           |          |
| 90     | 2.93        | 1.04     | 1.89       | 1.147     | 0.261    |        |             |          |            |           |          |
| 100    | 2.809       | 0.995    | 1.814      | 1.134     | 0.211    |        |             |          |            |           |          |
| 200    | 2.004       | 0.708    | 1.296      | 0.938     | 0.037    |        |             |          |            |           |          |
| 300    | 1.602       | 0.581    | 1.021      | 0.793     | 0.008    |        |             |          |            |           |          |
| 400    | 1.361       | 0.507    | 0.854      | 0.693     | 0.002    |        |             |          |            |           |          |
| 500    | 1.193       | 0.454    | 0.739      | 0.618     | 0.001    |        |             |          |            |           |          |

Table S2: Positron Scattering Cross-section of  $F_2$  atom in units of  $\text{\AA}^2$

| E (eV) | $Q_{total}$ | $Q_{el}$ | $Q_{inel}$ | $Q_{ion}$ | $Q_{ps}$ | E (eV) | $Q_{total}$ | $Q_{el}$ | $Q_{inel}$ | $Q_{ion}$ | $Q_{ps}$ |
|--------|-------------|----------|------------|-----------|----------|--------|-------------|----------|------------|-----------|----------|
| 1      | 1.902       | 1.902    | 0          | 0         | 0        | 600    | 2.236       | 0.816    | 1.42       | 1.237     | 0        |
| 2      | 2.448       | 2.448    | 0          | 0         | 0        | 700    | 2.028       | 0.75     | 1.278      | 1.132     | 0        |
| 3      | 2.72        | 2.72     | 0          | 0         | 0        | 800    | 1.86        | 0.694    | 1.166      | 1.047     | 0        |
| 4      | 2.866       | 2.866    | 0          | 0         | 0        | 900    | 1.72        | 0.648    | 1.072      | 0.973     | 0        |
| 5      | 2.952       | 2.952    | 0          | 0         | 0        | 1000   | 1.6         | 0.608    | 0.992      | 0.909     | 0        |
| 6      | 3.002       | 3.002    | 0          | 0         | 0        | 1500   | 1.204       | 0.472    | 0.732      | 0.691     | 0        |
| 7      | 3.032       | 3.032    | 0          | 0         | 0        | 2000   | 0.976       | 0.39     | 0.586      | 0.561     | 0        |
| 8      | 3.046       | 3.046    | 0          | 0         | 0        | 2500   | 0.822       | 0.334    | 0.488      | 0.472     | 0        |
| 9      | 3.054       | 3.052    | 0.002      | 0         | 0        | 3000   | 0.714       | 0.294    | 0.42       | 0.409     | 0        |
| 10     | 3.214       | 3.04     | 0.174      | 0         | 0.172    | 3500   | 0.63        | 0.262    | 0.368      | 0.36      | 0        |
| 11     | 3.546       | 3.006    | 0.54       | 0         | 0.538    | 4000   | 0.568       | 0.238    | 0.33       | 0.324     | 0        |
| 12     | 3.944       | 2.958    | 0.986      | 0         | 0.984    | 4500   | 0.516       | 0.218    | 0.298      | 0.293     | 0        |
| 13     | 4.362       | 2.91     | 1.452      | 0         | 1.45     | 5000   | 0.472       | 0.2      | 0.272      | 0.268     | 0        |
| 14     | 4.77        | 2.866    | 1.904      | 0         | 1.902    |        |             |          |            |           |          |
| 15     | 5.15        | 2.828    | 2.322      | 0         | 2.32     |        |             |          |            |           |          |
| 16     | 5.5         | 2.798    | 2.702      | 0         | 2.698    |        |             |          |            |           |          |
| 17     | 5.816       | 2.776    | 3.04       | 0.007     | 2.98     |        |             |          |            |           |          |
| 18     | 6.096       | 2.758    | 3.338      | 0.032     | 3.166    |        |             |          |            |           |          |
| 19     | 6.346       | 2.746    | 3.6        | 0.08      | 3.28     |        |             |          |            |           |          |
| 20     | 6.57        | 2.74     | 3.83       | 0.149     | 3.34     |        |             |          |            |           |          |
| 25     | 7.312       | 2.73     | 4.582      | 0.669     | 3.18     |        |             |          |            |           |          |
| 30     | 7.652       | 2.728    | 4.924      | 1.225     | 2.766    |        |             |          |            |           |          |
| 35     | 7.758       | 2.71     | 5.048      | 1.67      | 2.346    |        |             |          |            |           |          |
| 40     | 7.738       | 2.678    | 5.06       | 1.993     | 1.986    |        |             |          |            |           |          |
| 45     | 7.642       | 2.636    | 5.006      | 2.217     | 1.682    |        |             |          |            |           |          |
| 50     | 7.51        | 2.584    | 4.926      | 2.37      | 1.436    |        |             |          |            |           |          |
| 60     | 7.192       | 2.472    | 4.72       | 2.531     | 1.066    |        |             |          |            |           |          |
| 70     | 6.856       | 2.356    | 4.5        | 2.583     | 0.81     |        |             |          |            |           |          |
| 80     | 6.536       | 2.244    | 4.292      | 2.584     | 0.626    |        |             |          |            |           |          |
| 90     | 6.24        | 2.14     | 4.1        | 2.557     | 0.494    |        |             |          |            |           |          |
| 100    | 5.966       | 2.044    | 3.922      | 2.517     | 0.392    |        |             |          |            |           |          |
| 200    | 4.216       | 1.432    | 2.784      | 2.063     | 0.058    |        |             |          |            |           |          |
| 300    | 3.366       | 1.164    | 2.202      | 1.747     | 0.01     |        |             |          |            |           |          |
| 400    | 2.856       | 1.008    | 1.848      | 1.529     | 0.002    |        |             |          |            |           |          |
| 500    | 2.502       | 0.9      | 1.602      | 1.365     | 0        |        |             |          |            |           |          |

Table S3: Positron Scattering Cross-section of  $HF$  atom in units of  $\text{\AA}^2$ 

| E (eV) | $Q_{total}$ | $Q_{el}$ | $Q_{inel}$ | $Q_{ion}$ | $Q_{ps}$ | E (eV) | $Q_{total}$ | $Q_{el}$ | $Q_{inel}$ | $Q_{ion}$ | $Q_{ps}$ |
|--------|-------------|----------|------------|-----------|----------|--------|-------------|----------|------------|-----------|----------|
| 1      | 2.524       | 2.524    | 0          | 0         | 0        | 600    | 1.272       | 0.465    | 0.807      | 0.714     | 0        |
| 2      | 2.745       | 2.745    | 0          | 0         | 0        | 700    | 1.15        | 0.426    | 0.724      | 0.651     | 0        |
| 3      | 2.798       | 2.798    | 0          | 0         | 0        | 800    | 1.051       | 0.394    | 0.657      | 0.598     | 0        |
| 4      | 2.794       | 2.794    | 0          | 0         | 0        | 900    | 0.97        | 0.368    | 0.602      | 0.553     | 0        |
| 5      | 2.77        | 2.77     | 0          | 0         | 0        | 1000   | 0.9         | 0.345    | 0.555      | 0.514     | 0        |
| 6      | 2.739       | 2.739    | 0          | 0         | 0        | 1500   | 0.671       | 0.266    | 0.405      | 0.385     | 0        |
| 7      | 2.704       | 2.704    | 0          | 0         | 0        | 2000   | 0.539       | 0.219    | 0.32       | 0.309     | 0        |
| 8      | 2.669       | 2.669    | 0          | 0         | 0        | 2500   | 0.453       | 0.187    | 0.266      | 0.259     | 0        |
| 9      | 2.633       | 2.632    | 0.001      | 0         | 0        | 3000   | 0.391       | 0.164    | 0.227      | 0.222     | 0        |
| 10     | 2.663       | 2.592    | 0.071      | 0         | 0.07     | 3500   | 0.344       | 0.146    | 0.198      | 0.194     | 0        |
| 11     | 2.848       | 2.537    | 0.311      | 0         | 0.31     | 4000   | 0.308       | 0.132    | 0.176      | 0.173     | 0        |
| 12     | 3.098       | 2.474    | 0.624      | 0         | 0.623    | 4500   | 0.28        | 0.121    | 0.159      | 0.157     | 0        |
| 13     | 3.366       | 2.411    | 0.955      | 0         | 0.954    | 5000   | 0.255       | 0.111    | 0.144      | 0.142     | 0        |
| 14     | 3.623       | 2.351    | 1.272      | 0         | 1.271    |        |             |          |            |           |          |
| 15     | 3.859       | 2.296    | 1.563      | 0         | 1.562    |        |             |          |            |           |          |
| 16     | 4.07        | 2.247    | 1.823      | 0         | 1.822    |        |             |          |            |           |          |
| 17     | 4.254       | 2.204    | 2.05       | 0.003     | 2.021    |        |             |          |            |           |          |
| 18     | 4.415       | 2.167    | 2.248      | 0.018     | 2.14     |        |             |          |            |           |          |
| 19     | 4.551       | 2.133    | 2.418      | 0.049     | 2.203    |        |             |          |            |           |          |
| 20     | 4.666       | 2.103    | 2.563      | 0.096     | 2.223    |        |             |          |            |           |          |
| 25     | 5.004       | 1.99     | 3.014      | 0.46      | 2.023    |        |             |          |            |           |          |
| 30     | 5.091       | 1.904    | 3.187      | 0.837     | 1.692    |        |             |          |            |           |          |
| 35     | 5.054       | 1.83     | 3.224      | 1.127     | 1.391    |        |             |          |            |           |          |
| 40     | 4.955       | 1.76     | 3.195      | 1.328     | 1.146    |        |             |          |            |           |          |
| 45     | 4.828       | 1.695    | 3.133      | 1.46      | 0.951    |        |             |          |            |           |          |
| 50     | 4.691       | 1.634    | 3.057      | 1.545     | 0.796    |        |             |          |            |           |          |
| 60     | 4.414       | 1.523    | 2.891      | 1.624     | 0.571    |        |             |          |            |           |          |
| 70     | 4.158       | 1.426    | 2.732      | 1.639     | 0.422    |        |             |          |            |           |          |
| 80     | 3.929       | 1.342    | 2.587      | 1.625     | 0.319    |        |             |          |            |           |          |
| 90     | 3.724       | 1.268    | 2.456      | 1.597     | 0.244    |        |             |          |            |           |          |
| 100    | 3.543       | 1.204    | 2.339      | 1.562     | 0.19     |        |             |          |            |           |          |
| 200    | 2.455       | 0.829    | 1.626      | 1.244     | 0.021    |        |             |          |            |           |          |
| 300    | 1.947       | 0.671    | 1.276      | 1.036     | 0.004    |        |             |          |            |           |          |
| 400    | 1.64        | 0.578    | 1.062      | 0.897     | 0        |        |             |          |            |           |          |
| 500    | 1.429       | 0.514    | 0.915      | 0.794     | 0        |        |             |          |            |           |          |

Table S4: Positron Scattering Cross-section of  $CF_4$  atom in units of  $\text{\AA}^2$ 

| E (eV) | $Q_{total}$ | $Q_{el}$ | $Q_{inel}$ | $Q_{ion}$ | $Q_{ps}$ | E (eV) | $Q_{total}$ | $Q_{el}$ | $Q_{inel}$ | $Q_{ion}$ | $Q_{ps}$ |
|--------|-------------|----------|------------|-----------|----------|--------|-------------|----------|------------|-----------|----------|
| 1      | 6.441       | 6.441    | 0          | 0         | 0        | 600    | 5.541       | 2.13     | 3.411      | 2.571     | 0        |
| 2      | 7.854       | 7.854    | 0          | 0         | 0        | 700    | 5.012       | 1.948    | 3.064      | 2.319     | 0        |
| 3      | 8.492       | 8.492    | 0          | 0         | 0        | 800    | 4.585       | 1.796    | 2.789      | 2.109     | 0        |
| 4      | 8.801       | 8.801    | 0          | 0         | 0        | 900    | 4.232       | 1.671    | 2.561      | 1.942     | 0        |
| 5      | 8.962       | 8.962    | 0          | 0         | 0        | 1000   | 3.93        | 1.564    | 2.366      | 1.792     | 0        |
| 6      | 9.041       | 9.041    | 0          | 0         | 0        | 1500   | 2.939       | 1.202    | 1.737      | 1.31      | 0        |
| 7      | 9.073       | 9.073    | 0          | 0         | 0        | 2000   | 2.371       | 0.986    | 1.385      | 1.034     | 0        |
| 8      | 9.071       | 9.071    | 0          | 0         | 0        | 2500   | 1.992       | 0.841    | 1.151      | 0.856     | 0        |
| 9      | 9.057       | 9.051    | 0.006      | 0         | 0        | 3000   | 1.726       | 0.737    | 0.989      | 0.732     | 0        |
| 10     | 9.48        | 8.984    | 0.496      | 0         | 0.344    | 3500   | 1.519       | 0.655    | 0.864      | 0.631     | 0        |
| 11     | 10.38       | 8.858    | 1.522      | 0         | 1.076    | 4000   | 1.367       | 0.593    | 0.774      | 0.563     | 0        |
| 12     | 11.455      | 8.698    | 2.757      | 0         | 1.968    | 4500   | 1.24        | 0.542    | 0.698      | 0.505     | 0        |
| 13     | 12.572      | 8.539    | 4.033      | 0         | 2.9      | 5000   | 1.133       | 0.497    | 0.636      | 0.456     | 0        |
| 14     | 13.65       | 8.392    | 5.258      | 0         | 3.804    |        |             |          |            |           |          |
| 15     | 14.644      | 8.262    | 6.382      | 0         | 4.64     |        |             |          |            |           |          |
| 16     | 15.549      | 8.155    | 7.394      | 0         | 5.396    |        |             |          |            |           |          |
| 17     | 16.355      | 8.068    | 8.287      | 0.033     | 5.96     |        |             |          |            |           |          |
| 18     | 17.063      | 7.994    | 9.069      | 0.147     | 6.332    |        |             |          |            |           |          |
| 19     | 17.686      | 7.936    | 9.75       | 0.354     | 6.56     |        |             |          |            |           |          |
| 20     | 18.234      | 7.892    | 10.342     | 0.642     | 6.68     |        |             |          |            |           |          |
| 25     | 19.975      | 7.74     | 12.235     | 2.681     | 6.36     |        |             |          |            |           |          |
| 30     | 20.662      | 7.625    | 13.037     | 4.645     | 5.532    |        |             |          |            |           |          |
| 35     | 20.764      | 7.487    | 13.277     | 6.071     | 4.692    |        |             |          |            |           |          |
| 40     | 20.56       | 7.328    | 13.232     | 6.996     | 3.972    |        |             |          |            |           |          |
| 45     | 20.183      | 7.155    | 13.028     | 7.549     | 3.364    |        |             |          |            |           |          |
| 50     | 19.731      | 6.971    | 12.76      | 7.85      | 2.872    |        |             |          |            |           |          |
| 60     | 18.735      | 6.609    | 12.126     | 7.997     | 2.132    |        |             |          |            |           |          |
| 70     | 17.747      | 6.27     | 11.477     | 7.831     | 1.62     |        |             |          |            |           |          |
| 80     | 16.836      | 5.96     | 10.876     | 7.553     | 1.252    |        |             |          |            |           |          |
| 90     | 16.013      | 5.68     | 10.333     | 7.249     | 0.988    |        |             |          |            |           |          |
| 100    | 15.266      | 5.427    | 9.839      | 6.948     | 0.784    |        |             |          |            |           |          |
| 200    | 10.659      | 3.838    | 6.821      | 4.942     | 0.116    |        |             |          |            |           |          |
| 300    | 8.456       | 3.105    | 5.351      | 3.948     | 0.02     |        |             |          |            |           |          |
| 400    | 7.135       | 2.667    | 4.468      | 3.332     | 0.004    |        |             |          |            |           |          |
| 500    | 6.222       | 2.363    | 3.859      | 2.896     | 0        |        |             |          |            |           |          |

Table S5: Positron Scattering Cross-section of  $C_2F_6$  atom in units of  $\text{\AA}^2$ 

| E (eV) | $Q_{total}$ | $Q_{el}$ | $Q_{inel}$ | $Q_{ion}$ | $Q_{ps}$ | E (eV) | $Q_{total}$ | $Q_{el}$ | $Q_{inel}$ | $Q_{ion}$ | $Q_{ps}$ |
|--------|-------------|----------|------------|-----------|----------|--------|-------------|----------|------------|-----------|----------|
| 1      | 5.26        | 5.26     | 0          | 0         | 0        | 600    | 9.428       | 3.374    | 6.054      | 5.363     | 0        |
| 2      | 9.226       | 9.226    | 0          | 0         | 0        | 700    | 8.516       | 3.074    | 5.442      | 4.896     | 0        |
| 3      | 11.136      | 11.136   | 0          | 0         | 0        | 800    | 7.78        | 2.824    | 4.956      | 4.514     | 0        |
| 4      | 12.146      | 12.146   | 0          | 0         | 0        | 900    | 7.176       | 2.624    | 4.552      | 4.188     | 0        |
| 5      | 12.742      | 12.742   | 0          | 0         | 0        | 1000   | 6.662       | 2.454    | 4.208      | 3.903     | 0        |
| 6      | 13.118      | 13.118   | 0          | 0         | 0        | 1500   | 4.966       | 1.874    | 3.092      | 2.942     | 0        |
| 7      | 13.406      | 13.346   | 0.06       | 0         | 0.06     | 2000   | 4           | 1.536    | 2.464      | 2.376     | 0        |
| 8      | 15.314      | 13.364   | 1.95       | 0         | 1.95     | 2500   | 3.358       | 1.31     | 2.048      | 1.991     | 0        |
| 9      | 18.404      | 13.202   | 5.202      | 0         | 5.194    | 3000   | 2.904       | 1.146    | 1.758      | 1.718     | 0        |
| 10     | 21.724      | 13.008   | 8.716      | 0         | 8.708    | 3500   | 2.562       | 1.022    | 1.54       | 1.511     | 0        |
| 11     | 24.866      | 12.85    | 12.016     | 0         | 12.008   | 4000   | 2.296       | 0.922    | 1.374      | 1.352     | 0        |
| 12     | 27.692      | 12.764   | 14.928     | 0         | 14.92    | 4500   | 2.078       | 0.84     | 1.238      | 1.221     | 0        |
| 13     | 30.144      | 12.742   | 17.402     | 0         | 17.394   | 5000   | 1.902       | 0.776    | 1.126      | 1.112     | 0        |
| 14     | 32.24       | 12.77    | 19.47      | 0.002     | 19.422   |        |             |          |            |           |          |
| 15     | 34.002      | 12.83    | 21.172     | 0.07      | 20.668   |        |             |          |            |           |          |
| 16     | 35.472      | 12.912   | 22.56      | 0.288     | 21.242   |        |             |          |            |           |          |
| 17     | 36.69       | 12.998   | 23.692     | 0.662     | 21.362   |        |             |          |            |           |          |
| 18     | 37.69       | 13.088   | 24.602     | 1.168     | 21.154   |        |             |          |            |           |          |
| 19     | 38.492      | 13.168   | 25.324     | 1.767     | 20.732   |        |             |          |            |           |          |
| 20     | 39.142      | 13.242   | 25.9       | 2.429     | 20.17    |        |             |          |            |           |          |
| 25     | 40.68       | 13.444   | 27.236     | 5.847     | 16.626   |        |             |          |            |           |          |
| 30     | 40.596      | 13.386   | 27.21      | 8.537     | 13.332   |        |             |          |            |           |          |
| 35     | 39.782      | 13.158   | 26.624     | 10.341    | 10.716   |        |             |          |            |           |          |
| 40     | 38.656      | 12.84    | 25.816     | 11.47     | 8.704    |        |             |          |            |           |          |
| 45     | 37.406      | 12.472   | 24.934     | 12.136    | 7.156    |        |             |          |            |           |          |
| 50     | 36.144      | 12.092   | 24.052     | 12.505    | 5.944    |        |             |          |            |           |          |
| 60     | 33.744      | 11.352   | 22.392     | 12.718    | 4.224    |        |             |          |            |           |          |
| 70     | 31.598      | 10.68    | 20.918     | 12.58     | 3.096    |        |             |          |            |           |          |
| 80     | 29.74       | 10.092   | 19.648     | 12.312    | 2.324    |        |             |          |            |           |          |
| 90     | 28.11       | 9.57     | 18.54      | 11.996    | 1.77     |        |             |          |            |           |          |
| 100    | 26.682      | 9.108    | 17.574     | 11.669    | 1.368    |        |             |          |            |           |          |
| 200    | 18.346      | 6.308    | 12.038     | 9.166     | 0.152    |        |             |          |            |           |          |
| 300    | 14.492      | 5.03     | 9.462      | 7.68      | 0.022    |        |             |          |            |           |          |
| 400    | 12.192      | 4.276    | 7.916      | 6.682     | 0.006    |        |             |          |            |           |          |
| 500    | 10.606      | 3.76     | 6.846      | 5.943     | 0        |        |             |          |            |           |          |

Table S6: Positron Scattering Cross-section of  $C_6F_6$  atom in units of  $\text{\AA}^2$ 

| E (eV) | $Q_{total}$ | $Q_{el}$ | $Q_{inel}$ | $Q_{ion}$ | $Q_{ps}$ | E (eV) | $Q_{total}$ | $Q_{el}$ | $Q_{inel}$ | $Q_{ion}$ | $Q_{ps}$ |
|--------|-------------|----------|------------|-----------|----------|--------|-------------|----------|------------|-----------|----------|
| 1      | 8.418       | 8.418    | 0          | 0         | 0        | 600    | 16.458      | 5.268    | 11.19      | 10.292    | 0        |
| 2      | 16.11       | 16.11    | 0          | 0         | 0        | 700    | 14.802      | 4.752    | 10.05      | 9.353     | 0        |
| 3      | 19.512      | 19.512   | 0          | 0         | 0        | 800    | 13.476      | 4.338    | 9.138      | 8.582     | 0        |
| 4      | 38.562      | 20.34    | 18.222     | 0         | 18.222   | 900    | 12.39       | 3.996    | 8.394      | 7.941     | 0        |
| 5      | 64.614      | 21.288   | 43.326     | 0         | 43.326   | 1000   | 11.466      | 3.72     | 7.746      | 7.371     | 0        |
| 6      | 84.744      | 23.61    | 61.134     | 0         | 61.134   | 1500   | 8.478       | 2.796    | 5.682      | 5.505     | 0        |
| 7      | 98.586      | 26.436   | 72.15      | 0         | 72.15    | 2000   | 6.786       | 2.268    | 4.518      | 4.417     | 0        |
| 8      | 107.634     | 29.07    | 78.564     | 0         | 78.564   | 2500   | 5.676       | 1.92     | 3.756      | 3.691     | 0        |
| 9      | 113.28      | 31.23    | 82.05      | 0         | 82.038   | 3000   | 4.884       | 1.674    | 3.21       | 3.166     | 0        |
| 10     | 116.574     | 32.868   | 83.706     | 0.002     | 83.652   | 3500   | 4.29        | 1.488    | 2.802      | 2.77      | 0        |
| 11     | 118.254     | 34.038   | 84.216     | 0.272     | 82.536   | 4000   | 3.84        | 1.338    | 2.502      | 2.478     | 0        |
| 12     | 118.842     | 34.836   | 84.006     | 1.251     | 79.23    | 4500   | 3.468       | 1.218    | 2.25       | 2.231     | 0        |
| 13     | 118.668     | 35.334   | 83.334     | 2.886     | 74.844   | 5000   | 3.162       | 1.116    | 2.046      | 2.031     | 0        |
| 14     | 117.978     | 35.604   | 82.374     | 4.954     | 70.038   |        |             |          |            |           |          |
| 15     | 116.922     | 35.694   | 81.228     | 7.234     | 65.184   |        |             |          |            |           |          |
| 16     | 115.638     | 35.664   | 79.974     | 9.565     | 60.486   |        |             |          |            |           |          |
| 17     | 114.174     | 35.52    | 78.654     | 11.828    | 56.058   |        |             |          |            |           |          |
| 18     | 112.62      | 35.304   | 77.316     | 13.967    | 51.936   |        |             |          |            |           |          |
| 19     | 111         | 35.034   | 75.966     | 15.931    | 48.144   |        |             |          |            |           |          |
| 20     | 109.344     | 34.716   | 74.628     | 17.716    | 44.664   |        |             |          |            |           |          |
| 25     | 101.124     | 32.76    | 68.364     | 24.065    | 31.302   |        |             |          |            |           |          |
| 30     | 93.69       | 30.666   | 63.024     | 27.26     | 22.746   |        |             |          |            |           |          |
| 35     | 87.228      | 28.68    | 58.548     | 28.68     | 17.064   |        |             |          |            |           |          |
| 40     | 81.654      | 26.886   | 54.768     | 29.144    | 13.134   |        |             |          |            |           |          |
| 45     | 76.836      | 25.296   | 51.54      | 29.097    | 10.32    |        |             |          |            |           |          |
| 50     | 72.654      | 23.898   | 48.756     | 28.778    | 8.25     |        |             |          |            |           |          |
| 60     | 65.748      | 21.588   | 44.16      | 27.797    | 5.454    |        |             |          |            |           |          |
| 70     | 60.33       | 19.788   | 40.542     | 26.691    | 3.75     |        |             |          |            |           |          |
| 80     | 55.98       | 18.348   | 37.632     | 25.654    | 2.628    |        |             |          |            |           |          |
| 90     | 52.392      | 17.16    | 35.232     | 24.688    | 1.89     |        |             |          |            |           |          |
| 100    | 49.368      | 16.164   | 33.204     | 23.811    | 1.374    |        |             |          |            |           |          |
| 200    | 33.114      | 10.722   | 22.392     | 18.16     | 0.084    |        |             |          |            |           |          |
| 300    | 25.872      | 8.298    | 17.574     | 15.059    | 0.006    |        |             |          |            |           |          |
| 400    | 21.552      | 6.888    | 14.664     | 12.986    | 0        |        |             |          |            |           |          |
| 500    | 18.612      | 5.946    | 12.666     | 11.467    | 0        |        |             |          |            |           |          |

Table S7: Positron Scattering Cross-section of  $CHF_3$  atom in units of  $\text{\AA}^2$ 

| E (eV) | $Q_{total}$ | $Q_{el}$ | $Q_{inel}$ | $Q_{ion}$ | $Q_{ps}$ | E (eV) | $Q_{total}$ | $Q_{el}$ | $Q_{inel}$ | $Q_{ion}$ | $Q_{ps}$ |
|--------|-------------|----------|------------|-----------|----------|--------|-------------|----------|------------|-----------|----------|
| 1      | 4.83        | 4.83     | 0          | 0         | 0        | 600    | 4.879       | 1.76     | 3.119      | 2.763     | 0        |
| 2      | 6.557       | 6.557    | 0          | 0         | 0        | 700    | 4.402       | 1.603    | 2.799      | 2.518     | 0        |
| 3      | 7.337       | 7.337    | 0          | 0         | 0        | 800    | 4.018       | 1.474    | 2.544      | 2.317     | 0        |
| 4      | 7.723       | 7.723    | 0          | 0         | 0        | 900    | 3.7         | 1.366    | 2.334      | 2.147     | 0        |
| 5      | 7.927       | 7.927    | 0          | 0         | 0        | 1000   | 3.432       | 1.276    | 2.156      | 2         | 0        |
| 6      | 8.037       | 8.037    | 0          | 0         | 0        | 1500   | 2.552       | 0.973    | 1.579      | 1.503     | 0        |
| 7      | 8.092       | 8.092    | 0          | 0         | 0        | 2000   | 2.051       | 0.797    | 1.254      | 1.209     | 0        |
| 8      | 8.681       | 8.068    | 0.613      | 0         | 0.613    | 2500   | 1.72        | 0.679    | 1.041      | 1.012     | 0        |
| 9      | 10.051      | 7.941    | 2.11       | 0         | 2.106    | 3000   | 1.484       | 0.594    | 0.89       | 0.87      | 0        |
| 10     | 11.647      | 7.775    | 3.872      | 0         | 3.868    | 3500   | 1.305       | 0.529    | 0.776      | 0.761     | 0        |
| 11     | 13.216      | 7.624    | 5.592      | 0         | 5.588    | 4000   | 1.169       | 0.475    | 0.694      | 0.683     | 0        |
| 12     | 14.653      | 7.507    | 7.146      | 0         | 7.142    | 4500   | 1.06        | 0.436    | 0.624      | 0.615     | 0        |
| 13     | 15.911      | 7.423    | 8.488      | 0         | 8.484    | 5000   | 0.968       | 0.399    | 0.569      | 0.562     | 0        |
| 14     | 17          | 7.372    | 9.628      | 0         | 9.624    |        |             |          |            |           |          |
| 15     | 17.919      | 7.342    | 10.577     | 0.021     | 10.396   |        |             |          |            |           |          |
| 16     | 18.685      | 7.328    | 11.357     | 0.112     | 10.788   |        |             |          |            |           |          |
| 17     | 19.325      | 7.324    | 12.001     | 0.287     | 10.915   |        |             |          |            |           |          |
| 18     | 19.85       | 7.329    | 12.521     | 0.536     | 10.851   |        |             |          |            |           |          |
| 19     | 20.276      | 7.333    | 12.943     | 0.841     | 10.664   |        |             |          |            |           |          |
| 20     | 20.616      | 7.337    | 13.279     | 1.184     | 10.389   |        |             |          |            |           |          |
| 25     | 21.422      | 7.313    | 14.109     | 3.007     | 8.565    |        |             |          |            |           |          |
| 30     | 21.364      | 7.204    | 14.16      | 4.466     | 6.834    |        |             |          |            |           |          |
| 35     | 20.913      | 7.031    | 13.882     | 5.444     | 5.461    |        |             |          |            |           |          |
| 40     | 20.297      | 6.822    | 13.475     | 6.05      | 4.419    |        |             |          |            |           |          |
| 45     | 19.628      | 6.604    | 13.024     | 6.407     | 3.62     |        |             |          |            |           |          |
| 50     | 18.955      | 6.387    | 12.568     | 6.602     | 2.998    |        |             |          |            |           |          |
| 60     | 17.678      | 5.975    | 11.703     | 6.711     | 2.116    |        |             |          |            |           |          |
| 70     | 16.546      | 5.611    | 10.935     | 6.632     | 1.544    |        |             |          |            |           |          |
| 80     | 15.565      | 5.295    | 10.27      | 6.485     | 1.152    |        |             |          |            |           |          |
| 90     | 14.707      | 5.017    | 9.69       | 6.311     | 0.875    |        |             |          |            |           |          |
| 100    | 13.954      | 4.771    | 9.183      | 6.134     | 0.672    |        |             |          |            |           |          |
| 200    | 9.568       | 3.301    | 6.267      | 4.78      | 0.071    |        |             |          |            |           |          |
| 300    | 7.541       | 2.631    | 4.91       | 3.987     | 0.01     |        |             |          |            |           |          |
| 400    | 6.327       | 2.235    | 4.092      | 3.457     | 0        |        |             |          |            |           |          |
| 500    | 5.496       | 1.965    | 3.531      | 3.065     | 0        |        |             |          |            |           |          |

Table S8: Positron Scattering Cross-section of  $C_2H_2F_2$  atom in units of  $\text{\AA}^2$ 

| E (eV) | $Q_{total}$ | $Q_{el}$ | $Q_{inel}$ | $Q_{ion}$ | $Q_{ps}$ | E (eV) | $Q_{total}$ | $Q_{el}$ | $Q_{inel}$ | $Q_{ion}$ | $Q_{ps}$ |
|--------|-------------|----------|------------|-----------|----------|--------|-------------|----------|------------|-----------|----------|
| 1      | 6.256       | 6.256    | 0          | 0         | 0        | 600    | 5.853       | 1.905    | 3.948      | 3.63      | 0        |
| 2      | 8.547       | 8.547    | 0          | 0         | 0        | 700    | 5.252       | 1.718    | 3.534      | 3.288     | 0        |
| 3      | 9.493       | 9.493    | 0          | 0         | 0        | 800    | 4.772       | 1.567    | 3.205      | 3.01      | 0        |
| 4      | 11.303      | 9.828    | 1.475      | 0         | 1.475    | 900    | 4.383       | 1.445    | 2.938      | 2.779     | 0        |
| 5      | 18.018      | 9.617    | 8.401      | 0         | 8.401    | 1000   | 4.05        | 1.342    | 2.708      | 2.577     | 0        |
| 6      | 24.704      | 9.675    | 15.029     | 0         | 15.029   | 1500   | 2.977       | 1.006    | 1.971      | 1.91      | 0        |
| 7      | 29.912      | 10.072   | 19.84      | 0         | 19.84    | 2000   | 2.372       | 0.814    | 1.558      | 1.523     | 0        |
| 8      | 33.683      | 10.597   | 23.086     | 0         | 23.086   | 2500   | 1.98        | 0.689    | 1.291      | 1.269     | 0        |
| 9      | 36.299      | 11.128   | 25.171     | 0         | 25.167   | 3000   | 1.7         | 0.6      | 1.1        | 1.085     | 0        |
| 10     | 38.046      | 11.588   | 26.458     | 0         | 26.454   | 3500   | 1.488       | 0.532    | 0.956      | 0.945     | 0        |
| 11     | 39.155      | 11.953   | 27.202     | 0.02      | 26.997   | 4000   | 1.327       | 0.478    | 0.849      | 0.841     | 0        |
| 12     | 39.803      | 12.222   | 27.581     | 0.218     | 26.533   | 4500   | 1.195       | 0.434    | 0.761      | 0.755     | 0        |
| 13     | 40.117      | 12.405   | 27.712     | 0.66      | 25.468   | 5000   | 1.09        | 0.399    | 0.691      | 0.686     | 0        |
| 14     | 40.193      | 12.517   | 27.676     | 1.295     | 24.1     |        |             |          |            |           |          |
| 15     | 40.094      | 12.572   | 27.522     | 2.051     | 22.604   |        |             |          |            |           |          |
| 16     | 39.871      | 12.58    | 27.291     | 2.86      | 21.093   |        |             |          |            |           |          |
| 17     | 39.557      | 12.551   | 27.006     | 3.676     | 19.624   |        |             |          |            |           |          |
| 18     | 39.176      | 12.496   | 26.68      | 4.464     | 18.228   |        |             |          |            |           |          |
| 19     | 38.75       | 12.416   | 26.334     | 5.205     | 16.927   |        |             |          |            |           |          |
| 20     | 38.295      | 12.323   | 25.972     | 5.889     | 15.719   |        |             |          |            |           |          |
| 25     | 35.831      | 11.701   | 24.13      | 8.4       | 11.019   |        |             |          |            |           |          |
| 30     | 33.417      | 10.992   | 22.425     | 9.715     | 7.982    |        |             |          |            |           |          |
| 35     | 31.239      | 10.302   | 20.937     | 10.32     | 5.976    |        |             |          |            |           |          |
| 40     | 29.319      | 9.671    | 19.648     | 10.538    | 4.593    |        |             |          |            |           |          |
| 45     | 27.639      | 9.106    | 18.533     | 10.549    | 3.608    |        |             |          |            |           |          |
| 50     | 26.167      | 8.607    | 17.56      | 10.45     | 2.882    |        |             |          |            |           |          |
| 60     | 23.724      | 7.783    | 15.941     | 10.106    | 1.908    |        |             |          |            |           |          |
| 70     | 21.793      | 7.139    | 14.654     | 9.711     | 1.307    |        |             |          |            |           |          |
| 80     | 20.232      | 6.622    | 13.61      | 9.327     | 0.919    |        |             |          |            |           |          |
| 90     | 18.94       | 6.197    | 12.743     | 8.973     | 0.656    |        |             |          |            |           |          |
| 100    | 17.847      | 5.838    | 12.009     | 8.644     | 0.481    |        |             |          |            |           |          |
| 200    | 11.934      | 3.881    | 8.053      | 6.536     | 0.028    |        |             |          |            |           |          |
| 300    | 9.286       | 3.006    | 6.28       | 5.381     | 0.002    |        |             |          |            |           |          |
| 400    | 7.708       | 2.495    | 5.213      | 4.614     | 0.002    |        |             |          |            |           |          |
| 500    | 6.635       | 2.154    | 4.481      | 4.056     | 0        |        |             |          |            |           |          |

Table S9: Positron Scattering Cross-section of  $C_2H_3F_3$  atom in units of  $\text{\AA}^2$ 

| E (eV) | $Q_{total}$ | $Q_{el}$ | $Q_{inel}$ | $Q_{ion}$ | $Q_{ps}$ | E (eV) | $Q_{total}$ | $Q_{el}$ | $Q_{inel}$ | $Q_{ion}$ | $Q_{ps}$ |
|--------|-------------|----------|------------|-----------|----------|--------|-------------|----------|------------|-----------|----------|
| 1      | 6.53        | 6.53     | 0          | 0         | 0        | 600    | 6.472       | 2.305    | 4.167      | 3.757     | 0        |
| 2      | 9.278       | 9.278    | 0          | 0         | 0        | 700    | 5.805       | 2.088    | 3.717      | 3.398     | 0        |
| 3      | 10.467      | 10.467   | 0          | 0         | 0        | 800    | 5.298       | 1.916    | 3.382      | 3.126     | 0        |
| 4      | 11.035      | 11.035   | 0          | 0         | 0        | 900    | 4.866       | 1.772    | 3.094      | 2.884     | 0        |
| 5      | 11.333      | 11.333   | 0          | 0         | 0        | 1000   | 4.502       | 1.651    | 2.851      | 2.677     | 0        |
| 6      | 11.495      | 11.495   | 0          | 0         | 0        | 1500   | 3.323       | 1.25     | 2.073      | 1.99      | 0        |
| 7      | 11.942      | 11.552   | 0.39       | 0         | 0.39     | 2000   | 2.651       | 1.014    | 1.637      | 1.59      | 0        |
| 8      | 14.007      | 11.419   | 2.588      | 0         | 2.588    | 2500   | 2.213       | 0.86     | 1.353      | 1.323     | 0        |
| 9      | 16.683      | 11.186   | 5.497      | 0         | 5.492    | 3000   | 1.906       | 0.752    | 1.154      | 1.133     | 0        |
| 10     | 19.367      | 10.971   | 8.396      | 0         | 8.391    | 3500   | 1.671       | 0.667    | 1.004      | 0.989     | 0        |
| 11     | 21.803      | 10.805   | 10.998     | 0         | 10.993   | 4000   | 1.493       | 0.601    | 0.892      | 0.881     | 0        |
| 12     | 23.912      | 10.7     | 13.212     | 0         | 13.207   | 4500   | 1.349       | 0.547    | 0.802      | 0.793     | 0        |
| 13     | 25.691      | 10.644   | 15.047     | 0         | 15.042   | 5000   | 1.23        | 0.504    | 0.726      | 0.719     | 0        |
| 14     | 27.166      | 10.627   | 16.539     | 0.01      | 16.41    |        |             |          |            |           |          |
| 15     | 28.372      | 10.629   | 17.743     | 0.11      | 17.099   |        |             |          |            |           |          |
| 16     | 29.34       | 10.643   | 18.697     | 0.348     | 17.286   |        |             |          |            |           |          |
| 17     | 30.115      | 10.659   | 19.456     | 0.713     | 17.145   |        |             |          |            |           |          |
| 18     | 30.723      | 10.677   | 20.046     | 1.18      | 16.773   |        |             |          |            |           |          |
| 19     | 31.188      | 10.687   | 20.501     | 1.714     | 16.264   |        |             |          |            |           |          |
| 20     | 31.533      | 10.688   | 20.845     | 2.287     | 15.668   |        |             |          |            |           |          |
| 25     | 32.066      | 10.59    | 21.476     | 5.1       | 12.417   |        |             |          |            |           |          |
| 30     | 31.513      | 10.337   | 21.176     | 7.189     | 9.665    |        |             |          |            |           |          |
| 35     | 30.515      | 9.997    | 20.518     | 8.512     | 7.593    |        |             |          |            |           |          |
| 40     | 29.355      | 9.619    | 19.736     | 9.282     | 6.06     |        |             |          |            |           |          |
| 45     | 28.177      | 9.24     | 18.937     | 9.695     | 4.915    |        |             |          |            |           |          |
| 50     | 27.043      | 8.877    | 18.166     | 9.887     | 4.042    |        |             |          |            |           |          |
| 60     | 24.975      | 8.218    | 16.757     | 9.903     | 2.828    |        |             |          |            |           |          |
| 70     | 23.208      | 7.666    | 15.542     | 9.695     | 2.046    |        |             |          |            |           |          |
| 80     | 21.708      | 7.198    | 14.51      | 9.413     | 1.52     |        |             |          |            |           |          |
| 90     | 20.419      | 6.796    | 13.623     | 9.114     | 1.147    |        |             |          |            |           |          |
| 100    | 19.306      | 6.449    | 12.857     | 8.821     | 0.877    |        |             |          |            |           |          |
| 200    | 13.02       | 4.436    | 8.584      | 6.727     | 0.089    |        |             |          |            |           |          |
| 300    | 10.171      | 3.51     | 6.661      | 5.545     | 0.011    |        |             |          |            |           |          |
| 400    | 8.475       | 2.958    | 5.517      | 4.765     | 0        |        |             |          |            |           |          |
| 500    | 7.322       | 2.582    | 4.74       | 4.194     | 0        |        |             |          |            |           |          |
